# Supplementary material
Source: PubMed Central journal article supplement (PMC1820660)

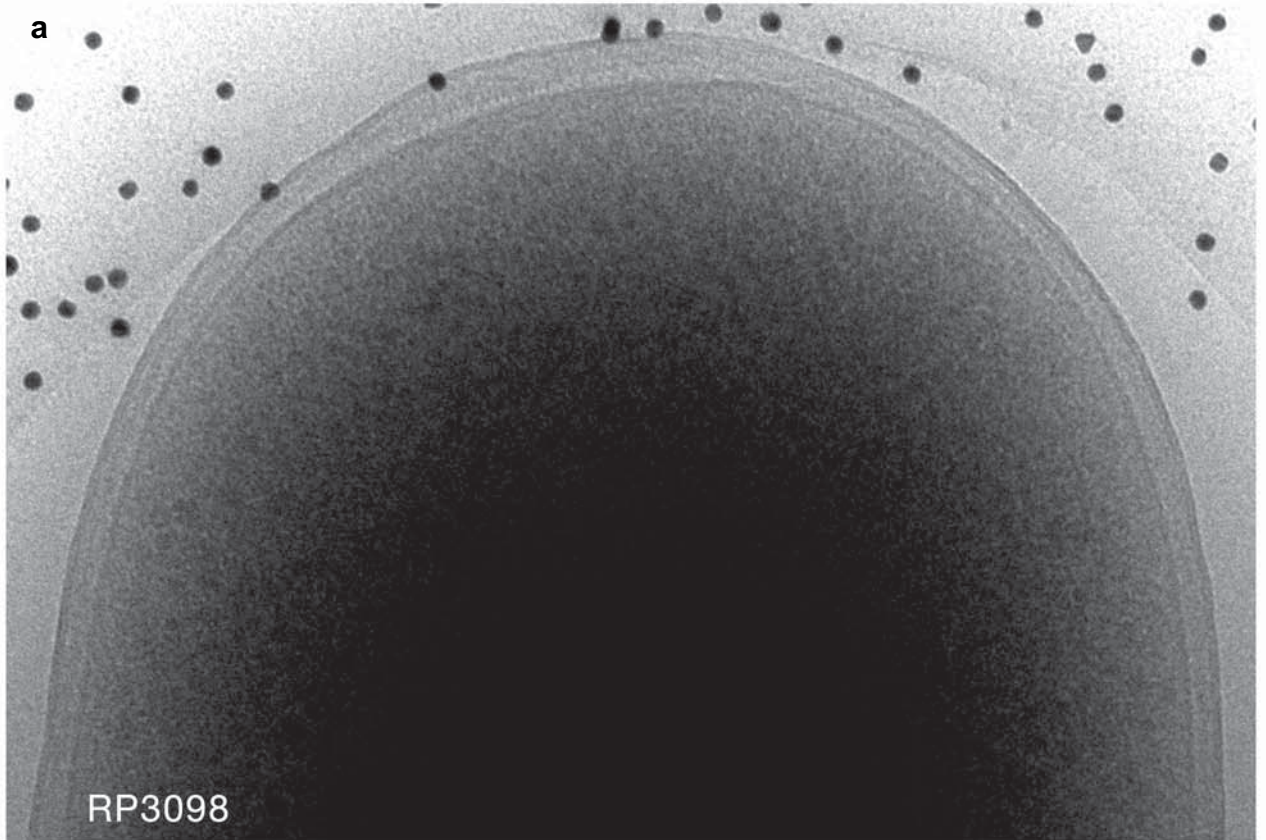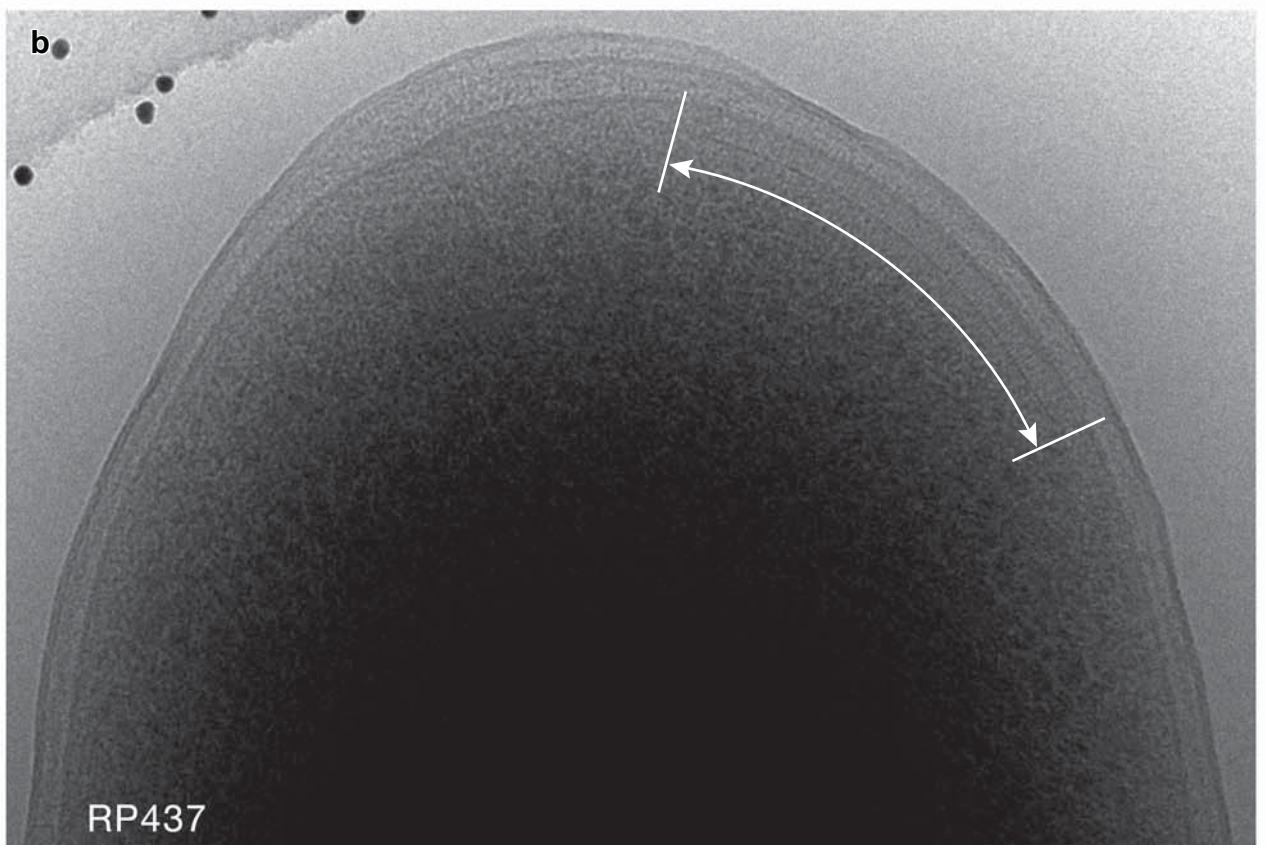

Supplement: pnas_0610106104_1.pdf [file pnas_0610106104_1.pdf]

**a**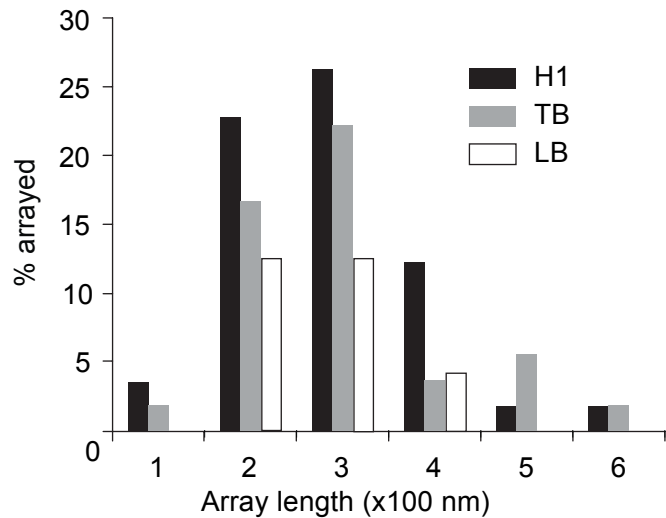**b**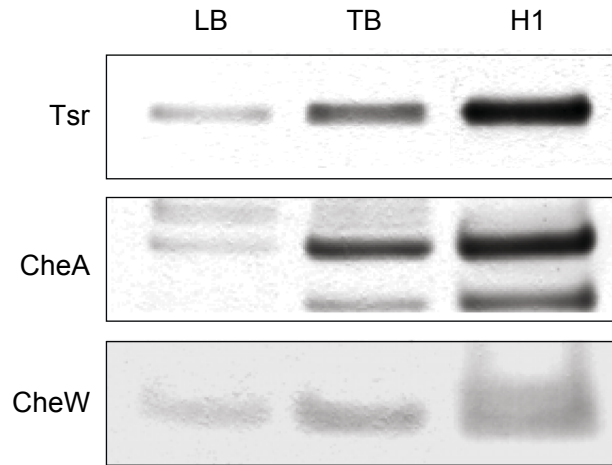

Supplement: pnas_0610106104_2.pdf [file pnas_0610106104_2.pdf]

**a**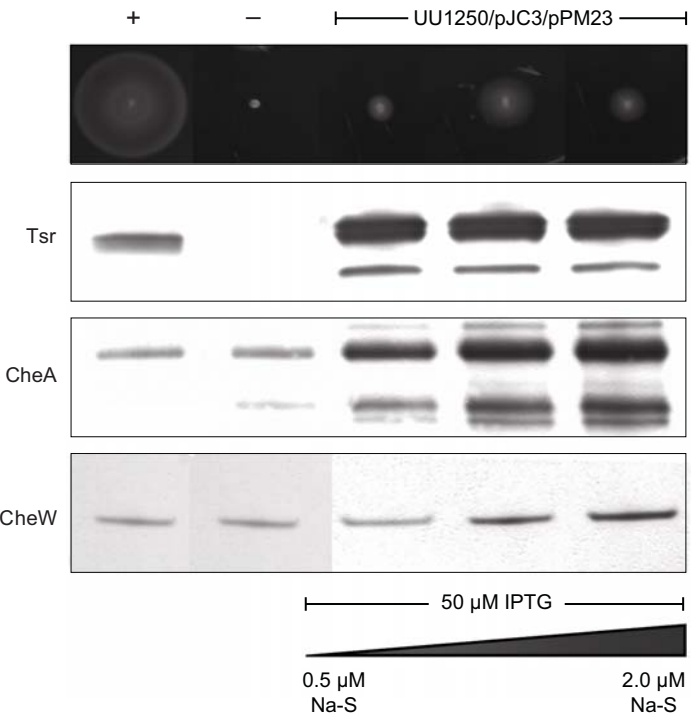**b**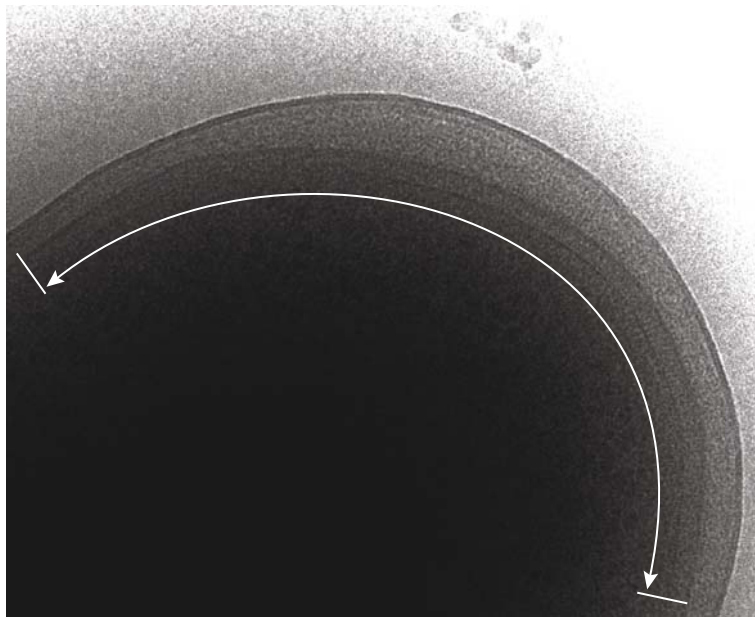

Supplement: pnas_0610106104_3.pdf [file pnas_0610106104_3.pdf]
